# Supplementary material
Source: Springer Nature journal article supplement (https://www.springermedizin.de/resource/supplementary/12889_2011_3667_MOESM1_ESM.pdf/9490418)
Supplement: MOESM1 [file 9490418]

**Supplemental Table 1: Distribution of socio-demographic, sexual behaviour and sex-work related characteristics, clients of female sex workers, Karnataka, South India (N=2,757)<sup>a</sup>**

|                   |                                              | Characteristic             | %           |
|-------------------|----------------------------------------------|----------------------------|-------------|
| Socio-demographic | Age                                          | 18-24                      | 29.7        |
|                   |                                              | 25-29                      | 24.6        |
|                   |                                              | 30-39                      | 28.7        |
|                   |                                              | 40+                        | 17.0        |
|                   |                                              | <i>Mean</i>                | <i>30.4</i> |
|                   | Marital status                               | Married                    | 62.1        |
|                   |                                              | Separated                  | 2.6         |
|                   |                                              | Never married              | 35.3        |
|                   | Occupation                                   | Transport                  | 25.9        |
|                   |                                              | Service                    | 13.8        |
|                   |                                              | Business                   | 11.6        |
|                   |                                              | Other (including Labourer) | 48.7        |
|                   | Can read and write                           | No                         | 25.3        |
|                   |                                              | Yes                        | 74.7        |
|                   | Districts                                    | Belgaum                    | 17.3        |
|                   |                                              | Bagalkot                   | 17.1        |
|                   |                                              | Bellary                    | 14.2        |
| Shimoga           |                                              | 15.5                       |             |
| Bangalore         |                                              | 30.6                       |             |
| Mysore            |                                              | 5.4                        |             |
| Sexual Behaviour  | Age at 1 <sup>st</sup> sex                   | <18                        | 15.4        |
|                   |                                              | 18-20                      | 52.9        |
|                   |                                              | 21-24                      | 21.1        |
|                   |                                              | 25+                        | 10.6        |
|                   |                                              | <i>Mean</i>                | <i>20.0</i> |
|                   | Have an intimate partner                     | 66.2                       |             |
|                   | Condom use in last sex with intimate partner | 10.3                       |             |
|                   | Never use condoms with intimate partner      | 86.5                       |             |
|                   | Anal sex with intimate partners              | 4.6                        |             |
|                   | Anal sex with MSM/hijra (6 months)           | 5.5                        |             |

|                                        |                                  |                |      |
|----------------------------------------|----------------------------------|----------------|------|
| Sex-Work Related                       | Age at 1 <sup>st</sup> paid sex  |                |      |
|                                        |                                  | <18            | 7.4  |
|                                        |                                  | 18-20          | 47.2 |
|                                        |                                  | 21-24          | 26.7 |
|                                        |                                  | 25+            | 18.7 |
|                                        |                                  | <i>Mean</i>    | 21.5 |
|                                        | Duration of paid sex             |                |      |
|                                        |                                  | 1 year or less | 14.3 |
|                                        |                                  | 2-4            | 25.3 |
|                                        |                                  | 5-9            | 22.4 |
|                                        |                                  | 10+            | 38.0 |
|                                        |                                  | <i>Mean</i>    | 8.9  |
|                                        | Place of solicitation, FSWs      |                |      |
|                                        |                                  | Public places  | 36.0 |
|                                        |                                  | Brothel        | 9.8  |
|                                        |                                  | Home           | 47.8 |
|                                        |                                  | Lodge          | 6.4  |
|                                        | Number of FSWs (Total: 6 months) |                |      |
|                                        |                                  | 1              | 17.0 |
|                                        |                                  | 2-3            | 40.7 |
|                                        | 4-5                              | 22.2           |      |
|                                        | 6-9                              | 12.6           |      |
|                                        | 10+                              | 7.4            |      |
|                                        | <i>Mean</i>                      | 4.3            |      |
| Number of Occasional FSWs (6 months)   |                                  |                |      |
|                                        | 0                                | 14.3           |      |
|                                        | 1                                | 12.9           |      |
|                                        | 2-4                              | 51.8           |      |
|                                        | 5+                               | 21.1           |      |
|                                        | <i>Mean</i>                      | 3.4            |      |
| Number of Regular FSWs (6 months)      |                                  |                |      |
|                                        | 0                                | 57.8           |      |
|                                        | 1                                | 28.5           |      |
|                                        | 2-4                              | 10.4           |      |
|                                        | 5+                               | 3.4            |      |
|                                        | <i>Mean</i>                      | 0.9            |      |
| Condom use in last sex, occasional FSW |                                  | 66.9           |      |
| Never use condoms, occasional FSW      |                                  | 26.3           |      |
| Condom use in last sex, regular FSW    |                                  | 59.9           |      |
| Never use condoms, regular FSW         |                                  | 32.4           |      |
| Ever asked for anal intercourse, FSW   |                                  | 11.2           |      |

|                     |                                  |      |
|---------------------|----------------------------------|------|
|                     | Ever had anal sex, FSW           | 7.8  |
|                     | Condom use in last anal sex, FSW | 57.1 |
| Pathogen Prevalence | CT                               | 1.8  |
|                     | NG                               | 0.5  |
|                     | CT/NG                            | 2.2  |
|                     | Active syphilis                  | 3.6  |
|                     | HIV                              | 5.6  |
|                     | HSV-2                            | 28.4 |

---

<sup>a</sup>MSM: Men who have sex with men; FSW: Female sex workers; CT: Chlamydia; NG: Gonorrhea; HIV: Human immunodeficiency virus; HSV-2: Herpes simplex virus, type 2
